# Supplementary material for: Bacterial biofilm under flow: First a physical struggle to stay, then a matter of breathing
Source: PLOS journal article supplement (doi:10.1371/journal.pone.0175197), 2017-04-12
Supplement: S1 (10.1371/journal.pone.0175197.s001) [file journal.pone.0175197.s001]

## Estimation of glucose concentration

Let us consider a channel of height  $h$ , width  $w$  and length  $L$ . We first consider the case of a biofilm attached to the channel bottom surface at  $z=0$  with a thickness  $e \ll h$ , under continuous supply of a medium, and that consumes glucose.

A molecule of glucose entering the channel at height  $z=z_0$  takes a mean time  $t_{ADV}=x_0/\langle v \rangle$  to reach the distance  $x_0$ , where  $\langle v \rangle$  is the mean fluid velocity. The mean time taken to diffuse to the channel bottom at  $z=0$  from a height  $z_0$  is  $t_{DIF}=z_0^2/D$ , where  $D$  is the diffusion coefficient of glucose. These two times define a curve:

$$z^*(x)=(x D/\langle v \rangle)^{1/2} \quad (1)$$

below which the concentration of glucose is less than  $c_0$  because of the consumption by the biofilm, and above which the concentration of glucose is  $c_0$ . Here  $c_0$  is the concentration of glucose in the culture medium.

The flow of glucose at  $z=e \approx 0$  through a horizontal slice of area  $A$  is equal to  $C$ , the number of molecules of glucose consumed per second by the bacterial biofilm within the slice.

To estimate the concentration  $c_s$  of glucose just above the slice, let the current of glucose along the  $z$  axis be:

$$j_z(x)=-D (c_0-c_s)/z^*(x)=-C/A \quad (2)$$

By combining (1), (2) and  $Q=\langle v \rangle w h$ , where  $Q$  is the fluid flow rate,  $c_s$  can be estimated by:

$$c_s(x)=c_0 - C/A *(x h w/(Q D))^{1/2} \quad (3)$$

with  $c_0=1.36 \times 10^{24}$  molecules/m<sup>3</sup> (corresponding to 0.4% glucose),  $D=5.7 \times 10^{-10}$  m<sup>2</sup>/s and  $Q=1$  ml/h  $=2.78 \times 10^{-10}$  m<sup>3</sup>/s.

$C/A$  is the consumption of glucose by unit area. The experimental data (recovering biofilm cells and measuring the optical density, not shown) suggest that there are  $\approx 10^9$  bacteria in a biofilm. By taking a maximum consumption rate  $c_M=197$  molecules of glucose per second per cell (Natarajan, A. & Srienc, F. Dynamics of glucose uptake by single Escherichia coli cells. *Metab Eng* **1**, 320-333, (1999)), we estimate:  $C/A= c_M/(hw)=6.6 \times 10^{15}$  molecules of glucose per m<sup>2</sup> per s.

The lowest concentration of glucose is found at the bottom of the channel near the outlet, at  $(x,y,z)=(L,y,0)$ , and is:

$$c_s(L)=c_0-C/A *(L h w/Q D)^{1/2} \quad (4)$$

It allows us to estimate  $c_s/c_0$  to be 0.998 in the 1 mm height channel, and 0.999 in the 250  $\mu$ m height channel.

If we take into account the variation of velocity along the  $z$  axis, using a Poiseuille velocity field, it does not affect significantly the result (not shown).

In the 250  $\mu$ m height channel, the biofilm grows from the edges (see text). The estimation of  $c_s$  in that case can be obtained by considering two slices of biofilm growing at  $z=0$  and  $z=h$ , in a channel where  $(w,h,L)=(0.25$  mm, 1 mm, 30 mm). The function  $z^*(x)$  is the same as (1) and gives  $z^*(L)=0.124$  mm  $< h/2$ ; thus, the glucose-depleted regions generated by both biofilm slices, where  $c < c_0$ , do not overlap. The lowest concentration of glucose is then calculated at  $x=L$  using (3), which still gives (4).

In this estimate, the  $y$ -dependence of velocity has been neglected.

### Experimental clues

The above theoretical evaluation was confirmed by experimental observations showing that no significant biofilm growth decrease occurred along the channel  $x$  axis (direction of the flow) — if the glucose were depleted, the biofilm would be progressively less dense toward the channel outlet. We measured light transmission  $I$  along the channel length  $x$  from the inlet to the outlet, for two 1 mm-height channels, in the presence of biofilm after 24h growth; Figure SII shows  $\ln(I_0/I)$  vs  $x$ .

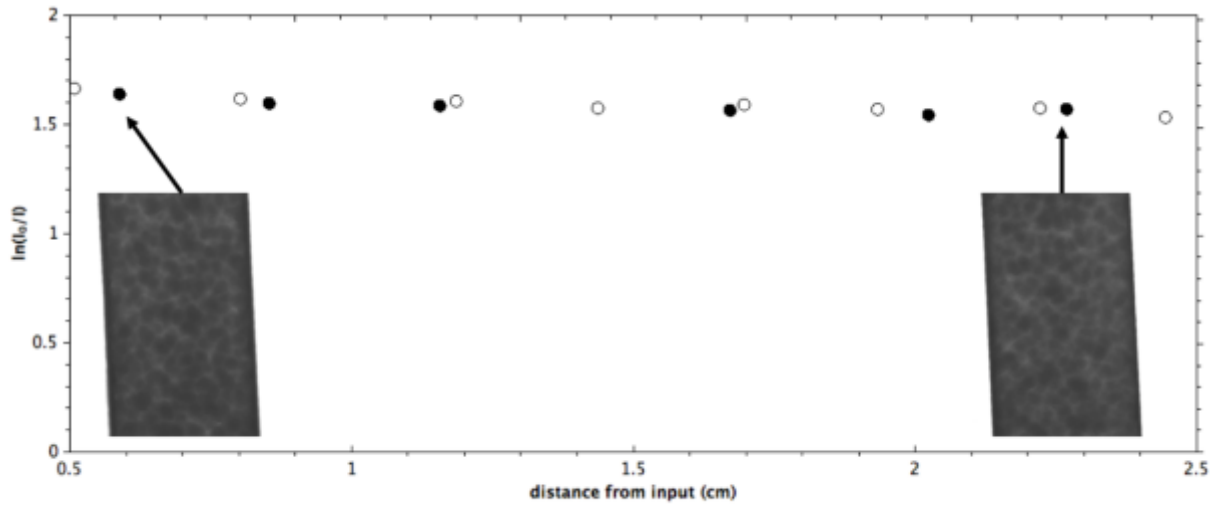

Figure SII:  $\ln(I_0/I)$  vs  $x$ , distance from channel inlet in cm (the length of a channel is 3 cm;  $x=0$  corresponds to the channel inlet). Filled and open circles: measurements in two different 1 mm height channels after 24 h of biofilm growth. Pictures: snapshots — field of view: 1 mm x 1.65 mm — of one channel taken with a 4x objective, near inlet (left) and near outlet (right), as indicated by the arrows; no significant differences are observed in biofilm microscopic absorbance.
